# Supplementary material for: Learning to Be an Orangutan—Implications of Life History for Orangutan Rehabilitation
Source: MDPI journal article supplement (doi:10.3390/ani11030767), 2021-03-10
Supplement: s1 [file s1]

**Learning to be an Orangutan – Implications of Life History for Orangutan Rehabilitation**

## Supplementary Material

**Table S1: Ethogram**

| <b>Activity budget</b>       |                                                                            |                                                                                                                                                                                                                                                                                                                                                                        |
|------------------------------|----------------------------------------------------------------------------|------------------------------------------------------------------------------------------------------------------------------------------------------------------------------------------------------------------------------------------------------------------------------------------------------------------------------------------------------------------------|
| Feed                         | Processing, gathering and ingestion of food items, drinking                | Classification: <ul style="list-style-type: none"> <li>Type of food (from caretaker, forest food, non-forest food, soil, invertebrate, left-overs, water, other, unknown)</li> <li>Part of plant (fruit, flower, seed, stem, pith, bark, leaves, young leaves, unknown)</li> </ul>                                                                                     |
| Rest                         | Sitting, lying, standing, hanging for more than 5 sec                      |                                                                                                                                                                                                                                                                                                                                                                        |
| Travel                       | Movements, usually between trees and patches                               |                                                                                                                                                                                                                                                                                                                                                                        |
| Social                       | Social interactions with conspecifics and/or caregivers                    | Classification: <ul style="list-style-type: none"> <li>Social play</li> <li>Sexual behaviour</li> <li>Conflict (aggressive and submissive)</li> <li>Affiliation (body contact, food sharing, peering, grooming, greeting, kissing, gentle touch, hugging)</li> <li>Caregiving (carrying, share a nest, protection from danger, sleeping in caregiver's lap)</li> </ul> |
| Other                        | Solitary activity, building a nest, stereotypic behaviour, other behaviour | Classification of solitary activity: <ul style="list-style-type: none"> <li>Solitary locomotor play</li> <li>Exploration/manipulation</li> <li>Vigilance</li> </ul> Classification of nest building: <ul style="list-style-type: none"> <li>Type of nest (ground, crotch, branch, trunk, connected trees)</li> <li>Quality of nest (old, rebuild, new)</li> </ul>      |
| <b>Use of Forest Stratum</b> |                                                                            |                                                                                                                                                                                                                                                                                                                                                                        |
| Ground                       | From the ground up to a height of 1 m                                      |                                                                                                                                                                                                                                                                                                                                                                        |
| 1-5 m                        | From >1 m up to a height of 5 m                                            |                                                                                                                                                                                                                                                                                                                                                                        |
| 5-10 m                       | From >5 m up to a height of 10 m                                           |                                                                                                                                                                                                                                                                                                                                                                        |
| >10 m                        | Higher than 10 m                                                           |                                                                                                                                                                                                                                                                                                                                                                        |
| <b>Proximity</b>             |                                                                            |                                                                                                                                                                                                                                                                                                                                                                        |
| Proximity 1                  | From body contact to 1 m distance                                          | Classification: <ul style="list-style-type: none"> <li>Human: female caregiver, male caregiver, familiar person, stranger</li> <li>Orangutan: name of orangutan</li> </ul>                                                                                                                                                                                             |
| Proximity 2                  | >1 to 5 m distance                                                         |                                                                                                                                                                                                                                                                                                                                                                        |
| Proximity 3                  | >5 to 10 m distance                                                        |                                                                                                                                                                                                                                                                                                                                                                        |
| Proximity 4                  | >10 m distance                                                             |                                                                                                                                                                                                                                                                                                                                                                        |

**Table S2:** Intra-individual comparison of social interaction frequencies (Amalia over 3 quarters, Eska and Cantik over 6 quarters).

|                              |               | Q1   | Q2   | Q3   | Q4   | Q5   | Q6    |
|------------------------------|---------------|------|------|------|------|------|-------|
| <b>Social human</b>          | <b>Amalia</b> |      |      |      | -0.7 | 4.4  | -3.7  |
|                              | <b>Eska</b>   | -1.7 | 9.7  | 2.2  | -4.7 | -2.6 | -3.3  |
|                              | <b>Cantik</b> | -6.5 | -0.2 | 8.0  | -2.3 | -1.3 | 2.6   |
| <b>Social OU</b>             | <b>Amalia</b> |      |      |      | 1.5  | 3.7  | -5.1  |
|                              | <b>Eska</b>   | 13.7 | 6.8  | 0.2  | -4.3 | -3.9 | -13.5 |
|                              | <b>Cantik</b> | 15.3 | 2.1  | 4.0  | 2.6  | -7.3 | -14.4 |
| <b>No social interaction</b> | <b>Amalia</b> |      |      |      | -0.1 | -0.7 | 0.7   |
|                              | <b>Eska</b>   | -4.1 | -3.4 | -0.3 | 2.0  | 1.6  | 4.7   |
|                              | <b>Cantik</b> | -3.3 | -0.5 | -2.2 | -0.4 | 2.2  | 3.6   |

Values refer to standardized residuals ( $r$ ). Darker colours highlight significantly higher values than expected (i.e. standardized residuals of  $\geq 2$ ); lighter colours highlight significantly lower values than expected (i.e. standardized residuals of  $\leq -2$ ).

**Table S3:** Intra-individual comparison of stratum use (Amalia over 3 quarters, Eska and Cantik over 6 quarters).

|                 |               | Q1   | Q2    | Q3    | Q4   | Q5   | Q6    |
|-----------------|---------------|------|-------|-------|------|------|-------|
| <b>Ground</b>   | <b>Amalia</b> |      |       |       | 14.8 | -1.7 | -11.9 |
|                 | <b>Eska</b>   | -2.7 | 13.5  | 12.7  | -0.9 | -7.0 | -16.4 |
|                 | <b>Cantik</b> | 2.2  | 8.0   | 6.7   | 8.0  | -5.6 | -16.3 |
| <b>1-5 m</b>    | <b>Amalia</b> |      |       |       | 12.9 | -0.9 | -10.9 |
|                 | <b>Eska</b>   | 3.0  | 2.9   | 2.8   | 0.1  | -0.2 | -8.9  |
|                 | <b>Cantik</b> | 8.3  | 4.5   | 5.3   | -1.2 | -4.7 | -10.8 |
| <b>5-10 m</b>   | <b>Amalia</b> |      |       |       | 0.5  | 1.2  | -1.7  |
|                 | <b>Eska</b>   | -5.9 | -7.6  | -7.0  | 7.6  | 5.4  | 8.7   |
|                 | <b>Cantik</b> | -3.0 | -4.3  | -2.4  | -2.5 | 0.5  | 10.6  |
| <b>&gt;10 m</b> | <b>Amalia</b> |      |       |       | -9.9 | 0.2  | 8.9   |
|                 | <b>Eska</b>   | 5.9  | -15.4 | -14.7 | -5.9 | 5.2  | 25.0  |
|                 | <b>Cantik</b> | -6.4 | -7.5  | -8.4  | -4.1 | 8.7  | 14.9  |

Values refer to standardized residuals ( $r$ ). Darker colours highlight significantly higher values than expected (i.e. standardized residuals of  $\geq 2$ ); lighter colours highlight significantly lower values than expected (i.e. standardized residuals of  $\leq -2$ ).
